# Supplementary material for: Rural-urban differences in health outcomes, healthcare use, and expenditures among older adults under universal health insurance in China
Source: PubMed Central journal article supplement (PMC7549821; doi:10.1371/journal.pone.0240194), 2020-10-12

# PLOS ONE

## Rural-Urban Differences in Health Outcomes, Healthcare Use, and Expenditures among Older Adults under Universal Health Insurance in China --Manuscript Draft--

|                                             |                                                                                                                                                                                                                                                                                                                                                                                                                                                                                                                                                                                                                                                                                                                                                                                                                                                                                                                                                                                                                                                                                                                                                                                                                                                                                                                                                                                                                                                                                                                                                                                                                                                                                                                                                                                                                                                                                                                                                                                                                                                                                                                                                                                                                                                                                                                                                                                                                                                                                                                                                                                                              |
|---------------------------------------------|--------------------------------------------------------------------------------------------------------------------------------------------------------------------------------------------------------------------------------------------------------------------------------------------------------------------------------------------------------------------------------------------------------------------------------------------------------------------------------------------------------------------------------------------------------------------------------------------------------------------------------------------------------------------------------------------------------------------------------------------------------------------------------------------------------------------------------------------------------------------------------------------------------------------------------------------------------------------------------------------------------------------------------------------------------------------------------------------------------------------------------------------------------------------------------------------------------------------------------------------------------------------------------------------------------------------------------------------------------------------------------------------------------------------------------------------------------------------------------------------------------------------------------------------------------------------------------------------------------------------------------------------------------------------------------------------------------------------------------------------------------------------------------------------------------------------------------------------------------------------------------------------------------------------------------------------------------------------------------------------------------------------------------------------------------------------------------------------------------------------------------------------------------------------------------------------------------------------------------------------------------------------------------------------------------------------------------------------------------------------------------------------------------------------------------------------------------------------------------------------------------------------------------------------------------------------------------------------------------------|
| <b>Manuscript Number:</b>                   | PONE-D-20-10022                                                                                                                                                                                                                                                                                                                                                                                                                                                                                                                                                                                                                                                                                                                                                                                                                                                                                                                                                                                                                                                                                                                                                                                                                                                                                                                                                                                                                                                                                                                                                                                                                                                                                                                                                                                                                                                                                                                                                                                                                                                                                                                                                                                                                                                                                                                                                                                                                                                                                                                                                                                              |
| <b>Article Type:</b>                        | Research Article                                                                                                                                                                                                                                                                                                                                                                                                                                                                                                                                                                                                                                                                                                                                                                                                                                                                                                                                                                                                                                                                                                                                                                                                                                                                                                                                                                                                                                                                                                                                                                                                                                                                                                                                                                                                                                                                                                                                                                                                                                                                                                                                                                                                                                                                                                                                                                                                                                                                                                                                                                                             |
| <b>Full Title:</b>                          | Rural-Urban Differences in Health Outcomes, Healthcare Use, and Expenditures among Older Adults under Universal Health Insurance in China                                                                                                                                                                                                                                                                                                                                                                                                                                                                                                                                                                                                                                                                                                                                                                                                                                                                                                                                                                                                                                                                                                                                                                                                                                                                                                                                                                                                                                                                                                                                                                                                                                                                                                                                                                                                                                                                                                                                                                                                                                                                                                                                                                                                                                                                                                                                                                                                                                                                    |
| <b>Short Title:</b>                         | Rural-Urban Differences in Health Outcomes, Healthcare Use, and Expenditures in China                                                                                                                                                                                                                                                                                                                                                                                                                                                                                                                                                                                                                                                                                                                                                                                                                                                                                                                                                                                                                                                                                                                                                                                                                                                                                                                                                                                                                                                                                                                                                                                                                                                                                                                                                                                                                                                                                                                                                                                                                                                                                                                                                                                                                                                                                                                                                                                                                                                                                                                        |
| <b>Corresponding Author:</b>                | meiling ying<br>University of Rochester<br>Rochester, UNITED STATES                                                                                                                                                                                                                                                                                                                                                                                                                                                                                                                                                                                                                                                                                                                                                                                                                                                                                                                                                                                                                                                                                                                                                                                                                                                                                                                                                                                                                                                                                                                                                                                                                                                                                                                                                                                                                                                                                                                                                                                                                                                                                                                                                                                                                                                                                                                                                                                                                                                                                                                                          |
| <b>Keywords:</b>                            |                                                                                                                                                                                                                                                                                                                                                                                                                                                                                                                                                                                                                                                                                                                                                                                                                                                                                                                                                                                                                                                                                                                                                                                                                                                                                                                                                                                                                                                                                                                                                                                                                                                                                                                                                                                                                                                                                                                                                                                                                                                                                                                                                                                                                                                                                                                                                                                                                                                                                                                                                                                                              |
| <b>Abstract:</b>                            | <p>We used the Chinese Longitudinal Healthy Longevity Surveys data containing a sample of 2624 urban and 6297 rural residents over 65 to investigate rural-urban differences in health outcomes, healthcare use and expenditures among insured elders after China's comprehensive healthcare reforms in 2009. Multivariable regression analyses were used to determine rural-urban differences in physical and psychological functions, self-reported access to care, and healthcare expenditures, after adjustment for individual socio-demographic characteristics and health conditions. Nonparametric tests were used to evaluate the changes in rural-urban differences between 2011 and 2014. Compared to rural residents, urban residents were more dependent in activities of daily living (ADLs, coef=-0.62; P&lt;0 . 0001 ) and instrumental ADLs (coef=-1.24; P&lt;0 . 0001 ), but showed better psychological well-being (coef=0.06; P =0 . 0220 ). Urban residents reported better adequate access to care (OR=2.24 ; P=0.0018 ), and higher adjusted total and out-of-pocket expenditures for inpatient (CNY3793 vs CNY2318; P&lt;0 . 0001 ; CNY1648 vs CNY1269, P=0 . 0051 , respectively), outpatient (CNY2708 vs CNY1370 ; P&lt;0 . 0001 ; CNY1381 vs CNY975; P&lt;0 . 0001 , respectively), and total (CNY 6335 vs CNY 3605 ; P&lt;0 . 0001 ; CNY 2575 vs CNY 1718; P&lt;0 . 0001 , respectively) care. However, rural residents had a higher adjusted self-payment ratio ( 69.5% vs 55.8%; P &lt;0 . 0001 ) for total care. Rural-urban differences in health outcomes (ADL, -0.66 vs -0.59; P&lt;0.0001; IADL, -1.38 vs -1.20; P&lt;0.0001; psychological well-being, 0.10 vs -0.00; P&lt;0.0001), adequate access to care (2.13 vs 1.93; P&lt;0.0001), and self-payment ratio (-19.6% vs -7.9%; P&lt;0.0001) significantly narrowed, but rural-urban differences in healthcare expenditures (Total outpatient expenditure, CNY 1029 vs CNY 1824; P=0.0147; Total out of pocket expenditure, CNY 360 vs CNY 1476; P=0.0007; Total inpatient out of pocket expenditure, CNY 161 vs CNY 802; P=0.0364; Total outpatient out of pocket expenditure, CNY 123 vs CNY 799; P=0.0002) significantly enlarged from 2011 to 2014. Although health and healthcare access improved for both rural and urban older adults in China between 2011 and 2014, rural-urban differences showed mixed trends. The remaining urban-rural differences are due possibly to variations in health insurance coverage, available healthcare resources and economic development between rural and urban areas.</p> |
| <b>Order of Authors:</b>                    | meiling ying<br>Sijiu Wang<br>Chen Bai<br>Yue Li                                                                                                                                                                                                                                                                                                                                                                                                                                                                                                                                                                                                                                                                                                                                                                                                                                                                                                                                                                                                                                                                                                                                                                                                                                                                                                                                                                                                                                                                                                                                                                                                                                                                                                                                                                                                                                                                                                                                                                                                                                                                                                                                                                                                                                                                                                                                                                                                                                                                                                                                                             |
| <b>Additional Information:</b>              |                                                                                                                                                                                                                                                                                                                                                                                                                                                                                                                                                                                                                                                                                                                                                                                                                                                                                                                                                                                                                                                                                                                                                                                                                                                                                                                                                                                                                                                                                                                                                                                                                                                                                                                                                                                                                                                                                                                                                                                                                                                                                                                                                                                                                                                                                                                                                                                                                                                                                                                                                                                                              |
| <b>Question</b>                             | <b>Response</b>                                                                                                                                                                                                                                                                                                                                                                                                                                                                                                                                                                                                                                                                                                                                                                                                                                                                                                                                                                                                                                                                                                                                                                                                                                                                                                                                                                                                                                                                                                                                                                                                                                                                                                                                                                                                                                                                                                                                                                                                                                                                                                                                                                                                                                                                                                                                                                                                                                                                                                                                                                                              |
| <b>Financial Disclosure</b>                 | The author(s) received no specific funding for this work                                                                                                                                                                                                                                                                                                                                                                                                                                                                                                                                                                                                                                                                                                                                                                                                                                                                                                                                                                                                                                                                                                                                                                                                                                                                                                                                                                                                                                                                                                                                                                                                                                                                                                                                                                                                                                                                                                                                                                                                                                                                                                                                                                                                                                                                                                                                                                                                                                                                                                                                                     |
| Enter a financial disclosure statement that |                                                                                                                                                                                                                                                                                                                                                                                                                                                                                                                                                                                                                                                                                                                                                                                                                                                                                                                                                                                                                                                                                                                                                                                                                                                                                                                                                                                                                                                                                                                                                                                                                                                                                                                                                                                                                                                                                                                                                                                                                                                                                                                                                                                                                                                                                                                                                                                                                                                                                                                                                                                                              |

describes the sources of funding for the work included in this submission. Review the [submission guidelines](#) for detailed requirements. View published research articles from [PLOS ONE](#) for specific examples.

This statement is required for submission and **will appear in the published article** if the submission is accepted. Please make sure it is accurate.

#### Unfunded studies

Enter: *The author(s) received no specific funding for this work.*

#### Funded studies

Enter a statement with the following details:

- Initials of the authors who received each award
- Grant numbers awarded to each author
- The full name of each funder
- URL of each funder website
- Did the sponsors or funders play any role in the study design, data collection and analysis, decision to publish, or preparation of the manuscript?
- **NO** - Include this sentence at the end of your statement: *The funders had no role in study design, data collection and analysis, decision to publish, or preparation of the manuscript.*
- **YES** - Specify the role(s) played.

\* typeset

#### Competing Interests

Use the instructions below to enter a competing interest statement for this submission. On behalf of all authors, disclose any [competing interests](#) that could be perceived to bias this work—acknowledging all financial support and any other relevant financial or non-financial competing interests.

This statement **will appear in the published article** if the submission is accepted. Please make sure it is accurate. View published research articles from [PLOS ONE](#) for specific examples.

The authors have declared that no competing interests exist.

**NO authors have competing interests**

Enter: *The authors have declared that no competing interests exist.*

**Authors with competing interests**

Enter competing interest details beginning with this statement:

*I have read the journal's policy and the authors of this manuscript have the following competing interests: [insert competing interests here]*

\* typeset

**Ethics Statement**

Enter an ethics statement for this submission. This statement is required if the study involved:

- Human participants
- Human specimens or tissue
- Vertebrate animals or cephalopods
- Vertebrate embryos or tissues
- Field research

Write "N/A" if the submission does not require an ethics statement.

General guidance is provided below. Consult the [submission guidelines](#) for detailed instructions. **Make sure that all information entered here is included in the Methods section of the manuscript.**

Our study has been approved by the Research Subjects Review Board of the University of Rochester.

**Format for specific study types**

**Human Subject Research (involving human participants and/or tissue)**

- Give the name of the institutional review board or ethics committee that approved the study
- Include the approval number and/or a statement indicating approval of this research
- Indicate the form of consent obtained (written/oral) or the reason that consent was not obtained (e.g. the data were analyzed anonymously)

**Animal Research (involving vertebrate animals, embryos or tissues)**

- Provide the name of the Institutional Animal Care and Use Committee (IACUC) or other relevant ethics board that reviewed the study protocol, and indicate whether they approved this research or granted a formal waiver of ethical approval
- Include an approval number if one was obtained
- If the study involved *non-human primates*, add *additional details* about animal welfare and steps taken to ameliorate suffering
- If anesthesia, euthanasia, or any kind of animal sacrifice is part of the study, include briefly which substances and/or methods were applied

**Field Research**

Include the following details if this study involves the collection of plant, animal, or other materials from a natural setting:

- Field permit number
- Name of the institution or relevant body that granted permission

**Data Availability**

Authors are required to make all data underlying the findings described fully available, without restriction, and from the time of publication. PLOS allows rare exceptions to address legal and ethical concerns. See the [PLOS Data Policy](#) and [FAQ](#) for detailed information.

Yes - all data are fully available without restriction

A Data Availability Statement describing where the data can be found is required at submission. Your answers to this question constitute the Data Availability Statement and **will be published in the article**, if accepted.

**Important:** Stating 'data available on request from the author' is not sufficient. If your data are only available upon request, select 'No' for the first question and explain your exceptional situation in the text box.

Do the authors confirm that all data underlying the findings described in their manuscript are fully available without restriction?

**Describe where the data may be found in full sentences. If you are copying our sample text, replace any instances of XXX with the appropriate details.**

- If the data are **held or will be held in a public repository**, include URLs, accession numbers or DOIs. If this information will only be available after acceptance, indicate this by ticking the box below. For example: *All XXX files are available from the XXX database (accession number(s) XXX, XXX).*
- If the data are all contained **within the manuscript and/or Supporting Information files**, enter the following: *All relevant data are within the manuscript and its Supporting Information files.*
- If neither of these applies but you are able to provide **details of access elsewhere**, with or without limitations, please do so. For example:

*Data cannot be shared publicly because of [XXX]. Data are available from the XXX Institutional Data Access / Ethics Committee (contact via XXX) for researchers who meet the criteria for access to confidential data.*

*The data underlying the results presented in the study are available from (include the name of the third party*

The datasets supporting the conclusions of this article are available by application on Peking University Open Research Data Platform <http://opendata.pku.edu.cn/dataverse/CHADS>.

|                                                                                                                                                                                                                                         |                                                                                                                                                                                  |
|-----------------------------------------------------------------------------------------------------------------------------------------------------------------------------------------------------------------------------------------|----------------------------------------------------------------------------------------------------------------------------------------------------------------------------------|
| <p><i>and contact information or URL).</i></p> <ul style="list-style-type: none"><li>• This text is appropriate if the data are owned by a third party and authors do not have permission to share the data.</li></ul> <p>* typeset</p> |                                                                                                                                                                                  |
| Additional data availability information:                                                                                                                                                                                               | Tick here if the URLs/accession numbers/DOIs will be available only after acceptance of the manuscript for publication so that we can ensure their inclusion before publication. |

---

# Rural-Urban Differences in Health Outcomes, Healthcare Use, and Expenditures among Older Adults under Universal Health Insurance in China

Meiling Ying<sup>1\*</sup>; Sijiu Wang<sup>1</sup>; Chen Bai<sup>2</sup>; Yue Li<sup>1</sup>

<sup>1</sup> Department of Public Health Sciences, School of Medicine and Dentistry, University of Rochester, 601 Elmwood Ave, Rochester, NY, USA, 14642

<sup>2</sup> Department of Social Security, School of Labor and Human Resources, Renmin University, No.59 Zhongguancun Street, Haidian District, Beijing, China, 100872.

\*Corresponding author:

E-mail: [Meiling\\_Ying@urmc.rochester.edu](mailto:Meiling_Ying@urmc.rochester.edu) (MY)

---

32 **Rural-Urban Differences in Health Outcomes, Healthcare Use, and Expenditures among**  
33 **Older Adults under Universal Health Insurance in China**

34

35 **Abstract**

36 We used the Chinese Longitudinal Healthy Longevity Surveys data containing a sample of  
37 2624 urban and 6297 rural residents over 65 to investigate rural-urban differences in health  
38 outcomes, healthcare use and expenditures among insured elders after China's comprehensive  
39 healthcare reforms in 2009. Multivariable regression analyses were used to determine rural-  
40 urban differences in physical and psychological functions, self-reported access to care, and  
41 healthcare expenditures, after adjustment for individual socio-demographic characteristics and  
42 health conditions. Nonparametric tests were used to evaluate the changes in rural-urban  
43 differences between 2011 and 2014. Compared to rural residents, urban residents were more  
44 dependent in activities of daily living (ADLs, coef=-0.62; P<0.0001) and instrumental ADLs  
45 (coef=-1.24; P<0.0001), but showed better psychological well-being (coef=0.06; P=0.0220).  
46 Urban residents reported better adequate access to care (OR=2.24; P=0.0018), and higher  
47 adjusted total and out-of-pocket expenditures for inpatient (CNY3793 vs CNY2318; P<0.0001;  
48 CNY1648 vs CNY1269, P=0.0051, respectively), outpatient (CNY2708 vs CNY1370;  
49 P<0.0001; CNY1381 vs CNY975; P<0.0001, respectively), and total (CNY6335 vs CNY3605;  
50 P<0.0001; CNY 2575 vs CNY1718; P<0.0001, respectively) care. However, rural residents  
51 had a higher adjusted self-payment ratio (69.5% vs 55.8%; P <0.0001) for total care. Rural-  
52 urban differences in health outcomes (ADL, -0.66 vs -0.59; P<0.0001; IADL, -1.38 vs -1.20;  
53 P<0.0001; psychological well-being, 0.10 vs -0.00; P<0.0001), adequate access to care (2.13

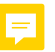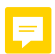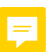



---

54 vs 1.93;  $P < 0.0001$ ), and self-payment ratio (-19.6% vs -7.9%;  $P < 0.0001$ ) significantly  
55 narrowed, but rural-urban differences in healthcare expenditures (Total outpatient expenditure,  
56 CNY 1029 vs CNY 1824;  $P = 0.0147$ ; Total out of pocket expenditure, CNY 360 vs CNY 1476;  
57  $P = 0.0007$ ; Total inpatient out of pocket expenditure, CNY 161 vs CNY 802;  $P = 0.0364$ ; Total  
58 outpatient out of pocket expenditure, CNY 123 vs CNY 799;  $P = 0.0002$ ) significantly enlarged  
59 from 2011 to 2014. Although health and healthcare access improved for both rural and urban  
60 older adults in China between 2011 and 2014, rural-urban differences showed mixed trends.  
61 The remaining urban-rural differences are due possibly to variations in health insurance  
62 coverage, available healthcare resources and economic development between rural and urban  
63 areas.

64

65

66

67

68

69

70

71

72

73

74

75

---

76 **Introduction**

77           Inequitable access to health services is an enduring concern of health care planners and  
78 policy-makers around the world. Rural/urban residency have long been considered as a critical  
79 determinant of health and healthcare use over time and across countries.(1-3) Over the past  
80 several decades, China has seen remarkable economic growth and improved health care. These  
81 improvements, however, were not equitable among rural and urban regions, with widely  
82 reported rural-urban differences in healthcare resources,(4) health outcomes,(5, 6) prevalence  
83 of diseases,(7, 8) and healthcare utilization.(3, 9) For example, urban residents in China were  
84 two to five times more likely to utilize outpatient and inpatient care than rural residents, during  
85 the period of 1993 to 2011.(9)

86           Inequality in socioeconomic status between residents in rural and urban areas of China  
87 may account for the rural-urban gaps in healthcare use partially.(10) For many decades, urban  
88 residents, those living in areas under the jurisdiction of cities and towns in China, have tended  
89 to have higher household income than rural residents (those living in countryside),(10) and in  
90 the past two decades urban China has seen a much faster economic growth than rural parts of  
91 the nation.(11)

92           Health insurance may also play a significant role in healthcare use. In China, public  
93 health insurance dominates the health insurance market, and the public health insurance  
94 programs available to rural and urban residents has long been operated separately for rural and  
95 urban residents. The employment-based insurance, the Urban Employees Based Medicare  
96 Insurance (UEBMI), was initiated in urban areas in 1998. The comprehensive UEBMI plan  
97 covers inpatient, outpatient, emergency room, and prescription drug expenses. (12) The Urban

---

98 Residents Basic Medical Insurance (URBMI) was launched in 2007, providing coverage for  
99 urban residents without formal employment with the goal of eliminating impoverishment due  
100 to chronic or fatal diseases; the URBMI primarily covers expenses on inpatient care. (12) In  
101 rural areas, the New Rural Cooperative Medical Scheme (NRCMS) was established in 2003,  
102 which provides partial coverage for all types of medical expenses, and its caps for  
103 reimbursement vary by regions and local economic development levels.(12) In 2008, the  
104 insurance rates in China were about 65% and 90% in urban and rural regions, respectively. (12)

105 In 2009, China launched an aggressive and comprehensive healthcare reform aimed to  
106 achieve affordable and equitable healthcare for all by 2020, with an estimated CNY850 billion  
107 (about US \$124 billion) governmental investment.(13-15) In 2011, 97% of rural and 95% of  
108 urban residents enrolled in public health insurance programs (i.e., the UEBMI, the URBMI, or  
109 the NRCMS),(16) indicating almost universal health insurance coverages. To maintain the  
110 universal coverage, China government increased per capita subsidy for public health insurance  
111 premium from CNY200 in 2011 to CNY320 in 2014.(17) To also improve covered insurance  
112 benefits and reduce personal catastrophic healthcare spending, in 2012, China expanded health  
113 insurance coverage for critical illness (e.g., lung cancer) without increasing premium. In 2014,  
114 700 million people were covered by the critical illness insurance, under a total of CNY9.7  
115 billion (\$1.6 billion) funds reserved for this program.(18)

116 China has the largest older population (age 65 or over) among the developing  
117 countries;(19) by 2027, its older population will increase to 20% (from 7% in 2002).(20)  
118 Population aging raises concerns about availability of healthcare services, increased healthcare  
119 costs, and sustainability of China's pension system.(9) These concerns may be more

---

120 pronounced for rural older adults who tend to have less access to care and less stable income  
121 than urban older adults, despite recent improvements in health insurance coverage.

122 Previous studies documented significant rural-urban gaps in healthcare and health  
123 outcome measures,(3, 20-33)although most of them focused on measures for all adults in China  
124 rather than older adults, and several studies only reported crude rural-urban differences without  
125 controlling for patient characteristics such as demographic characteristics and disease  
126 diagnoses. Other research evaluated rural-urban differences in healthcare access among older  
127 adults in China. For example, using the Chinese Longitudinal Healthy Longevity Surveys  
128 (CLHLS),one study(24)found that the associations between access to healthcare and health  
129 outcomes were generally stronger for older residents in rural areas than in urban areas, and the  
130 other study(26) that explored the impact of medical insurance on rural-urban gaps in healthcare  
131 use revealed that urban older adults had significantly better access to care and had higher  
132 healthcare expenditures than rural counterparts. Feng and colleagues exploited the China  
133 Health and Nutrition Survey data from 1991 through 2011 and found that compared with urban  
134 older persons, rural groups had lower medical expenditures.(25) However, these studies did not  
135 examine rural-urban differences in healthcare measures comprehensively, especially among  
136 older adults with insurance. Recent studies (27-33) evaluated the rural-urban gaps in healthcare  
137 metrics in universal health coverage. Nevertheless, their findings were either preliminary  
138 evaluations on all rural and urban residents (in a single area) (27-29) or cross-sectional analyses  
139 on all (older) adults for a single or some selected indicators.(31-33) In an analysis of the  
140 targeted seven provinces in China, Weng and Ning(30) showed that inequality in  
141 reimbursement rates of the basic medical insurance played an significant role in rural-urban

---

142 differences in healthcare expenses among all insured people instead of insured older adults.

143 To date, little is known about the rural-urban differences in health and healthcare  
144 measures after the establishment of the universal health insurance program in China in 2011,  
145 especially among older adults. This study reports overall pattern of rural-urban differences in  
146 a set of health and healthcare measures in 2011 and 2014, and compares these differences  
147 between the two years in order to track possible changes over time.

## 148 **Materials and methods**

### 149 **Data Sources**

150 This study used data from the 2011 and 2014 waves of the Chinese Longitudinal  
151 Healthy Longevity Survey (CLHLS). The CLHLS is the first national survey done in 631  
152 randomly selected counties and cities in 22 of the 31 provinces in China, covering about 85%  
153 of total population.(34) It provides self-reported information on activities of daily living (ADL),  
154 instrumental ADL (IADL), healthcare utilization, healthcare expenditures, demographic  
155 characteristics, family and household characteristics, lifestyle, psychological characteristics,  
156 and economic resources for adults aged 65 or over.(35) Previous studies reported high  
157 reliability, validity and other aspects data quality in the CLHLS.(36) Zeng and colleagues  
158 provided more details about the CLHLS, including sampling deign, follow-up interviews,   
159 procedures, and data quality.(34)

### 160 **Study Sample**

161 There were 7327 and 7100 observations in the 2011 and 2014 waves of CLHLS,  
162 respectively. Of the 14427 individuals in the two years data, 7039 were identified as rural  
163 residents, and 7388 were urban residents. Because this study focused on older adults with

---

164 public health insurance (defined as the UEBMI, the URBMI, or the NRCMS), 1747 uninsured  
165 residents were excluded. We further excluded 3759 individuals who lived in urban area but  
166 were covered by the NRCMS. This group typically was immigrants who had rural hukou but  
167 lived in urban cities, and we excluded them from study sample because they are likely to have  
168 different access to care than other urban residents due to their rural insurance status (we  
169 conducted sensitivity analyses in which the 3759 individuals were included in multivariable  
170 regressions; the results were very similar to results reported in the study. Appendix Tables A19,  
171 A20, A21, Supplementary Appendix). Our analytic sample included 2624 urban and 6297 rural  
172 residents.

### 173 **Independent Variable of Interest and Outcomes**

174 The independent variable of interest in this study was the rural/urban residency status.  
175 The CLHLS provides urban/rural residency at the time of survey (rather than “hukou” status,  
176 a mandatory regulation of household registration in China). According to the methodology  
177 proposed by the National Bureau of Statistics of China, (37, 38) and following prior studies,(37,  
178 39) rural/urban residency was defined in this study by one question in the CLHLS: “What is  
179 the current residence area of the interviewee?” We coded the answers as 1 (i.e., urban area) if  
180 the answers were city or town, and otherwise 0 for rural area.

181 The outcome variables included measures for health outcomes, adequate access to care,  
182 and healthcare expenditures.

183 Health outcome measures included those for ADL, IADL, and psychological well-being.  
184 For ADL, we extracted 5 items from the CLHLS that measured levels of independence for  
185 bathing, dressing, toilet use, transferring, and eating. The IADL measure included 8 items for

---

186 communication, shopping, cooking, laundry, walking continuously for 1 kilometer, lifting a  
187 weight, continuously crouching and standing up three times, and taking public transportation  
188 to assess the elders' independent living skills. Each ADL or IADL item measures functional  
189 status on a scale from 0 to 2 (assistance needed always, assistance needed sometimes, and no  
190 assistance needed, respectively). Thus, the total score ranges from 0 to 10 for the ADL measure  
191 and from 0 to 16 for the IADL measure, with higher score indicating more independence. The  
192 measure of psychological well-being was derived from four items in CLHLS and had a score  
193 ranging from 0 to 4 with higher score indicating better psychological state (Appendix  
194 A1.Outcome Definitions, Supplementary Appendix).

195 Adequate access to healthcare services, measuring the availability of care for those who  
196 do need care,(39) was defined by a single question in the CLHLS: "Could you get adequate  
197 medical service at present when it is necessary?" with possible answers of yes (coded as 1) or  
198 no (coded as 0). Furthermore, we included a set of healthcare expenditure measures, including  
199 total expenditure, total out of pocket (OOP) spending, total expenditures for inpatient and  
200 outpatient care, OOP expenditures for inpatient and outpatient care, and ratio of total OOP  
201 expenditures to total expenditures (self-payment ratio). We obtained the Consumer Price Index  
202 from the National Bureau of Statistics of China, and adjusted all 2011 expenditures to the 2014  
203 amount.(40) More details about these outcomes are described in the appendix (Appendix  
204 A1.Outcome Definitions, Supplementary Appendix).

## 205 **Covariates**

206 According to previous studies (34, 39, 41)on health outcomes and healthcare utilization,  
207 we extracted relevant covariates from the CLHLS including individual demographic

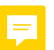

---

208 characteristics, socioeconomic status (SES) in childhood and at presents, family care resources,  
209 and health behaviors. Demographic information included age groups (65-69, 60-79, 80-89, 90-  
210 99, >100) and sex (male/female). Childhood SES was measured by whether the respondent  
211 went to bed hungry (yes, no, and missing), and got adequate medical services when sick (yes,  
212 no, and missing) in childhood. Current SES was measured by education level (never,  
213 elementary school, middle school, high school or higher, and missing) and occupation  
214 (profession/administration, others, and missing). Family care resources included marital status  
215 (married/single), whether the respondent was living with others (yes/no), the number of living  
216 children, whether the respondent had sufficient financial support for daily costs (yes/no), and  
217 annual income per capita. Health behavior measures included those about smoking status,  
218 alcohol drinking behavior, exercise, sleep quality, and regular physical examination. We also  
219 included regional dummies (east, middle, and west) to adjust for possible geographic variations.  
220 We further included arm length as an indicator of early-life nutritional status,(42) which has  
221 been considered a preferred anthropometric measure for studies of the elderly.(43-45) In  
222 multivariable analyses for healthcare expenditures (and self-payment ratio), we further  
223 adjusted for the following covariates: self-reported health (very good, good, so-so, bad),  
224 whether the respondent had serious illness in the last 2 years, the number of diagnosed chronic  
225 diseases, scores of ADL, IADL and psychological well-being, and cognitive function measured  
226 by the Mini Mental State Examination score.(39, 46) 

## 227 **Statistical Analysis**

228 We first compared health outcomes, healthcare use and expenditures and covariates  
229 between rural and urban residents, pooling the 2 waves of data (i.e., 2011 and 2014). We used



---

230  $\chi^2$  tests for categorical variables, and t tests for continuous variables for comparisons.

231 We fit multivariable regression models on the pooled data, using linear regression for  
232 continuous health outcome variables (ADL, IADL and psychological well-being scores), and  
233 a logit regression for the binary dependent variable of adequate access to care.

234 The health expenditures data took nonnegative values and had a substantial proportion  
235 of values being zero. In a review study, Mihaylova and colleagues recommended that two-part  
236 model be used for modeling expenditure data with excessive zeros.(47) The two part model  
237 with logit or probit in the first part and a generalized linear model (GLM) in the second model  
238 has also been widely used in recent health service research studies.(48-51) In the present study,  
239 we fit two-part models for all expenditure variables with a logit model in the first part, modeling  
240 if the respondent had positive expenditure, and a GLM with gamma distribution and log link  
241 function in the second part, modeling patterns of positive expenditures. Because urban  
242 residence was a time invariant variable, multivariable regressions with random effects were  
243 applied to all measures.

244 We further fit the same multivariable regression models above on each of the 2011 and  
245 2014 waves of data separately. We then conducted a nonparametric test with bootstrap  
246 resampling (500 times) to compare the coefficients for rural-urban differences in 2011 and 2014.

247 Education, occupation, whether respondents went to bed hungry or had sufficient  
248 medical service in childhood had relatively high missing rates, ranging from 4.4% to 20.6%.  
249 We defined missing values as a separate group in main analyses (described above). In the  
250 sensitivity analyses, we excluded the individuals with any missing values, and the results  
251 remained very similar and thus are not reported. All regressions reported robust standard error.

---

252 To help ease the interpretation of model results, we computed margins of adjusted  
253 outcomes for urban (i.e., Urban-adjusted in Table 2 and Table 3) and rural (i.e., Rural-adjusted  
254 in Table 2 and Table 3) residents, respectively, by applying the “margins” STATA command  
255 after multivariable regressions; the marginal estimates of rural-urban differences in outcomes  
256 were obtained in a similar way. We used STATA version 15.1 (Stata Statistical Software:  
257 Release 15. College Station, TX: StataCorp LLC) for statistical analyses.

### 258 **Ethics Statement**

259 Our study has been approved by the Research Subjects Review Board of the University of  
260 Rochester.

### 261 **Results**

262 Table 1 presents the descriptive statistics of respondent characteristics by urban/rural  
263 residency. Urban residents were more dependent in ADLs (8.69 vs 9.01), but had better  
264 psychological well-being (3.65 vs 3.46) than rural residents. Urban residents had higher total  
265 and OOP expenditures for inpatient care (CNY5201 vs CNY1859; and CNY2184 vs  
266 CNY1051, respectively), for outpatient care (CNY3627 vs CNY1182; CNY 1646 vs CNY896,  
267 respectively), and for all health care (CNY8529 vs CNY2891; CNY3332 vs CNY1486,  
268 respectively), but had lower self-payment ratio (53% vs 72%) than rural residents ( $p < 0.0001$   
269 in all cases). Urban residents also reported to have greater adequate access to care (98.4% vs  
270 94.5%;  $P < 0.0001$ ) than rural residents.

271 After adjusting for covariates, rural-urban differences in these health measures above  
272 were still significant (Table 2 and Appendix Tables A1, A2, A3, A4, A5, A6, Supplementary  
273 Appendix). Urban residents were more dependent in ADLs (adjusted difference = -0.62;

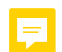

---

274 P<0.0001) and IADLs (adjusted difference=-1.24; P<0.0001), had better psychological well-  
275 being (adjusted difference=0.06; P=0.0220), and reported greater access to care (adjusted odds  
276 ratio=2.24; P=0.0018). Urban residents also had higher adjusted total expenditures for inpatient  
277 care (adjusted difference=CNY1475; P<0.0001), outpatient care (adjusted  
278 difference=CNY1338;P<0.0001), and both inpatient and outcome care (adjusted  
279 difference=CNY2730 ; P<0.0001), as well as higher adjusted OOP expenditures for inpatient  
280 care (adjusted difference=CNY379; P=0.0051), outpatient care (adjusted difference=CNY406;  
281 P<0.0001), and inpatient and outpatient care combined (adjusted difference=CNY857;  
282 P<0.0001). We also found urban residents to face lower self-payment ratio (adjusted  
283 difference=-13.7%; P<0.0001) than their rural counterparts.

284 In analyses stratified by year, we found slightly improved ADL and IADL functions,  
285 psychological well-being, adequate access to care, healthcare expenditures (higher) and self-  
286 payment ratio (lower) for both rural and urban residents from 2011 to 2014 (Table 3, Appendix  
287 Tables A7, A8, A9, A10, A11, A12, A13, A14, A15, A16, A17, A18 and Appendix Fig. A1,  
288 Supplementary Appendix). Although urban and rural residents were not significantly different  
289 in total OOP expenditures for inpatient and outpatient care in 2011 or in psychological well-  
290 being in 2014, urban and rural residents significantly differed in most of other health measures  
291 in the two years.

292 Our results also suggested that the gaps in health outcomes, adequate access to care and  
293 self-payment ratio between rural and urban residents narrowed, but differences in healthcare  
294 expenditures enlarged from 2011 to 2014. Table 4 reports the nonparametric comparisons of  
295 the adjusted rural-urban differences between 2011 and 2014. We found that rural-urban

---

296 differences significantly decreased in ADLs (change in rural-urban difference=-0.07;  
297 P<0.0001), IADLs (change in rural-urban difference=-0.18; P<0.0001), psychological well-  
298 being (change in rural-urban difference=0.10; P<0.0001), adequate access to care (change in  
299 rural-urban difference=1.11; P <0.0001) and self-payment ratio (change in rural-urban  
300 difference=-11.7%; P<0.0001). However, rural-urban differences significantly increased in  
301 total outpatient expenditure (change in rural-urban difference=CNY-795; P=0.0147), total  
302 OOP expenditures for total (change in rural-urban difference=CNY-1116; P=0.0007), inpatient  
303 (change in rural-urban difference=CNY-641; P=0.0364), and outpatient (change in rural-urban  
304 difference=CNY-676; P=0.0002) care from 2011 to 2014. There was no significant change in  
305 rural-urban difference in total medical (change in rural-urban difference=CNY-1065,  
306 P=0.1055) and inpatient expenditures (change in rural-urban difference=CNY-315; P=0.5506).

## 307 **Discussion**

308 In this study of older adults in China with public health insurance, we evaluated the  
309 adjusted rural-urban differences in health outcomes (i.e., ADLs, IADLs and psychological  
310 well-being), self-reported access to care, and healthcare expenditures in 2011 and 2014. We  
311 found that urban residents had worse physical health status, better psychological well-being,  
312 more access to care, higher healthcare expenditures, and lower self-payment ratio than rural  
313 residents. Rural-urban differences in health outcomes, adequate access to care and self-  
314 payment ratio significantly decreased, while the differences in healthcare expenditures  
315 significantly increased from 2011 to 2014.

316 Our findings that urban residents had worse physical function than their rural  
317 counterparts are consistent with results of previous studies.(10, 32, 52-56) Several potential

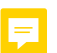

---

318 explanations are provided for our results. First, recent economic development in China might  
319 have exposed urban residents to higher air and water pollution than rural residents,(57) limiting  
320 urban residents' outdoor activities and reducing their physical function ability. Furthermore,  
321 recent studies(53, 58) have demonstrated that the decreased physical functional ability among  
322 older urban residents were significantly associated with air pollution. Second, population  
323 density in urban China is extremely high so that a large majority of the urban residents live in  
324 apartment buildings. The elderly who live in apartments either take elevators or live on the  
325 ground floor, and very few of them have access to yards or gardens.(52) Therefore, the amount  
326 of physical activities that Chinese urban old population participated in might be reduced,  
327 resulting in execrations in physical limitations subsequently.(10, 52) While the majority of  
328 Chinese rural older adults dwell in houses, and they have their own garden and/or agricultural  
329 field.(52) They perform garden work to grow vegetables or even perform regular labor in the  
330 fields, which contributes to maintaining their capacity for daily living. (52) In addition, it is  
331 very common that Chinses rural older persons are still working at aged 60-69 years, and the   
332 rates of engagement decline to below 20% only after 80 years old. (59, 60) Third, in general,  
333 Chinese rural residents may value independence more highly than urban residents (10, 52, 61)  
334 thus, rural older residents may be more proactive to be engaged in physical activities and  
335 maintain their physical and functional independence.

336         Several other studies, however, reported somewhat different results about the rural-  
337 urban difference in physical function. Using two waves data from the China Sampling Surveys  
338 on Disability, Peng and colleagues concluded that urban residents had better physical ability  
339 than rural residents in analysis of sampled persons aged 0 to 85 (or above).(23) Two other

---

340 studies(62, 63) using the China Health and Retirement Longitudinal Study database reported  
341 that urban residents had lower risk of physical disability than rural groups among people aged  
342 between 45 and 80. These different findings may be due to the different samples included in  
343 these studies (e.g., the trajectories of physical function and disability may be different among  
344 adolescents, middle-aged adults, and older adults), different analytic approaches (e.g., one  
345 study(23) did not adjust for patient characteristics as possible confounders, and another  
346 study(63) used projected estimates to compare future rural-urban difference), and different  
347 research questions being tested (e.g., Hou and colleagues(62) aimed to examined the effects  
348 of urbanization on health status by comparing health measures among residents in recently  
349 urbanized areas, rural areas and existing urban areas).

350         Recent economic development in China may have benefited residents in both urban and  
351 rural areas, which could explain the improved physical function from 2011 to 2014 among both  
352 groups. The annual average per capita disposable income rose from CNY6977(64) in 2011 to  
353 CNY10489(65) in 2014 in rural China, and from CNY21810(64) in 2011 to CNY29381(65)  
354 in 2014 in urban areas; increased disposable income, especially among urban residents, may  
355 make paid outdoor activities more affordable. China’s economic development also enables  
356 urban and rural communities to provide more facilities for old residents (especially for older  
357 urban residents with limited physical activities before). Moreover, both rural and urban  
358 residential committees organized diverse activities (e.g., group dancing), encouraging the  
359 elderly to be more physically active.

360         Compared to rural residents, urban residents in our study showed better psychological  
361 well-being after controlling other covariates, consistent with previous findings.(32, 66)

---

362 Differences in socio-economic status were reported to be an significant factor explaining  
363 different psychological health status among Chinese older people.(67) In general, urban  
364 residents have better socioeconomic status and higher disposable income than rural residents.  
365 The findings of improved psychological well-being among rural residents and narrowed rural-  
366 urban differences from 2011 to 2014 may be explained by the faster increase rate in annual  
367 average per capita disposable income among rural residents.(64, 65, 68) The improved  
368 psychological health status among rural residents may also result from the continuous  
369 expansion and improved benefits of public health insurance in rural areas. Publicly financed  
370 insurance covers outpatient and inpatient mental health care,(69) including diagnosis, treatment,  
371 and rehabilitation services,(69) and as a result, rural residents had more access to mental health  
372 care over time.

373 In line with earlier studies, (7, 9, 70) our study showed that urban residents had  
374 significantly higher access to care than rural residents. People residing in rural areas usually  
375 suffer from the shortage of healthcare providers, extended travel to health care facilities, lower  
376 income to purchase health services, and lack of social support.(71, 72) Financing for China's  
377 health care institutions partially depends on local governments, which vary considerably in  
378 their financial capacities between well-developed urban areas and under-developed rural  
379 villages. The number of village health clinics increased by only 8 percent from 2005 to 2017,  
380 whereas the number of hospitals in urban areas grew by 66% over the same period.(73) It has  
381 been reported that urban–rural disparities in supply of healthcare providers account for about a  
382 third of overall inter-county inequality.(74) Different health insurance benefits may be another  
383 reason for self-reported disparities in access to care.(75) Rural residents are stipulated to

---

384 participate in the local NRCMS, which has less comprehensive benefits than that of the UEBMI  
385 and URBMI programs available for urban residents. About 53.4% of hospitalization  
386 expenditures for older people in urban areas and 30.5% in rural areas were reimbursed by  
387 medical insurance in 2012.(67) Under the two-tiered health insurance systems, rural residents  
388 usually encounter more financial barriers to healthcare, although our results suggest that rural-  
389 urban disparities in self-reported access to care narrowed slightly from 2011 to 2014. The  
390 narrowed disparities over time likely reflect the faster economic growth rate in rural areas and  
391 targeted efforts of China government to improve insurance coverages for rural residents in  
392 recent years. In line with these findings on self-reported access to care and potential  
393 explanations, we further found that, although urban residents had significantly lower self-  
394 payment ratio than rural residents over time for healthcare, this rural-urban difference was  
395 reduced substantially from 2011 to 2014.

396         Similar to a previous research (76), our study revealed increasing gaps in healthcare  
397 expenditures for both inpatient and outpatient care between urban and rural residents, despite  
398 the reduced rural-urban disparities in self-reported access to care. This suggests that although  
399 rural residents experienced significant improvements in insurance coverage and perceived  
400 access to care, urban residents benefited disproportionately from increased insurance subsidies,  
401 improved insurance coverages, and overall economic growth in terms of realized access to  
402 health care after adjusting for differences in physical and mental health conditions, as well as  
403 diagnoses of chronic conditions.

404         Our study had several limitations. First, this study was not able to examine the causes  
405 of the rural-urban differences. Although we discussed several possible explanations above, it



---

406 is possible that other factors, such as physician/provider practice styles and environmental  
407 factors, are also related to health status, healthcare utilization, and healthcare expenditures, as  
408 well as rural-urban differences in these measures. Examining how these factors may be related  
409 to rural-urban differences will be important research areas for further study. Second, our study  
410 relies on self-reported measures of health outcome, healthcare utilization and expenditure,  
411 which leads to potential recall bias in survey responses, and which may bias the estimated rural-  
412 urban differences if urban and rural residents differed in how they responded to survey  
413 questions. Third, we were not able to control for individual fixed effects in the pooled analysis  
414 because different persons were sampled in the surveys of 2011 and 2014 and even persons  
415 might appear in both years' surveys, the data we had do not allow us to identify them. Fourth,  
416 we did not specifically conduct analyses on China's rural-urban differences associated with  
417 different types of medical insurance initiatives. The UEBMI, URBMI, and NRCMS are  
418 significantly different from each other in terms of covered benefits and beneficiary  
419 characteristics, and future studies should be conducted to compare the three health insurance  
420 schemes separately, and evaluate the extent to which they contribute to China's rural-urban  
421 differences in health outcomes and expenditures.

## 422 **Conclusions**

423 In conclusion, this study found that health outcomes and self-reported access to care  
424 improved from 2011 to 2014 for both rural and urban older adults in China, and rural-urban  
425 differences narrowed. However, rural-urban differences in inpatient, outpatient, and total health  
426 care expenditures enlarged from 2011 to 2014, despite growing expenditures in both groups.  
427 The remaining urban-rural differences are possibly due to variations in health insurance

---

428 coverages, available healthcare resources and economic development between rural and urban  
429 areas. Our findings provide evidence that supports China’s implementation of integrated rural  
430 and urban public health insurance systems starting in 2019. Additionally, inequalities in the  
431 healthcare resource distribution and economic development between rural and urban areas  
432 should be addressed.

433

434

435

436

437

438

439

440

441

442

443

444

445

446

447

448

449

---

450 **Authors' contributions**

451 MY designed the study, performed the statistical analyses, drafted and revised the paper. SW  
452 conducted analyses, interpreted the results, and revised this manuscript. CB conducted analyses  
453 and revised the paper. YL designed the study and the statistical models, interpreted the results,  
454 and revised the paper.

455

456

457 **Acknowledgements**

458 This research uses data from Chinese Longitudinal Healthy Longevity Surveys (CLHLS). We  
459 thank the China Center for Economic Research at Peking University for supplying the CLHLS  
460 data from 2011 to 2014.

---

## References

1. Haggerty JL, Roberge D, Levesque JF, Gauthier J, Loignon C. An exploration of rural-urban differences in healthcare-seeking trajectories: implications for measures of accessibility. *Health & place*. 2014;28:92-8.
2. Sundquist K, Frank G, Sundquist J. Urbanisation and incidence of psychosis and depression: follow-up study of 4.4 million women and men in Sweden. *The British Journal of Psychiatry*. 2004;184(4):293-8.
3. Liu M, Zhang Q, Lu M, Kwon CS, Quan H. Rural and urban disparity in health services utilization in China. *Med Care*. 2007;45(8):767-74.
4. Chen Y, Yin Z, Xie Q. Suggestions to ameliorate the inequity in urban/rural allocation of healthcare resources in China. *Int J Equity Health*. 2014;13:34.
5. Tian D, Sun L, Zhang L, Zhang L, Zhang W, Li L, et al. Large urban-rural disparity in the severity of two-week illness: updated results based on the first health service survey of Hunan Province, China. *Int J Equity Health*. 2016;15:37.
6. Liu H, Rizzo JA, Fang H. Urban-rural disparities in child nutrition-related health outcomes in China: The role of hukou policy. *BMC Public Health*. 2015;15(1):1159.
7. Jian W, Chan KY, Reidpath DD, Xu L. China's Rural-Urban Care Gap Shrank For Chronic Disease Patients, But Inequities Persist. *Health Affairs*. 2010;29(12):2189-96.
8. Li LW, Liu J, Xu H, Zhang Z. Understanding Rural-Urban Differences in Depressive Symptoms Among Older Adults in China. *J Aging Health*. 2016;28(2):341-62.
9. Li J, Shi L, Liang H, Ding G, Xu L. Urban-rural disparities in health care utilization among Chinese adults from 1993 to 2011. *BMC health services research*. 2018;18(1):102-.
10. Sun F, Park NS, Klemmack DL, Roff LL, Li Z. Predictors of physical functioning trajectories among Chinese oldest old adults: rural and urban differences. *The International Journal of Aging and Human Development*. 2009;69(3):181-99.
11. Tian X. Thoughts on rural social security reform under the "Dual economy.". *Population Journal*. 2002;136(6):3-6.
12. Zhao H. China's Health Insurance Reform and Disparities in Healthcare Utilization and Costs. 2015. 
13. Chen Z. Launch of the health-care reform plan in China. *The Lancet*. 2009;373(9672):1322-4.
14. Alcorn T, Bao B. China progresses with health reform but challenges remain. *Lancet*. 2011;377(9777):1557-8.
15. Yip W, Hsiao WC. The Chinese health system at a crossroads. *Health Aff (Millwood)*. 2008;27(2):460-8.
16. Yu H. Universal health insurance coverage for 1.3 billion people: What accounts for China's success? *Health Policy*. 2015;119(9):1145-52.
17. Li Y, Huang Z, Feng J. Financial subsidies for China's social health insurance: Current situation, problems and solutions. *Chinese Journal of Health Policy*. 2015;8(6):1-7.
18. York CGotPsRoCiN. Critical illness insurance covers 700 million Chinese. 2015.
19. Nations U. World population prospects: The 2015 revision, key findings and advance tables. Rep No ESA/P/WP 241. 2015.
20. Glinskaya E, Feng Z. Options for Aged Care in China : Building an Efficient and Sustainable Aged Care System 2018.
21. Jiang J, Wang P. Health status in a transitional society: urban-rural disparities from a dynamic perspective in China. *Population Health Metrics*. 2018;16(1):22.
22. Li J, Shi L, Liang H, Ding G, Xu L. Urban-rural disparities in health care utilization among Chinese adults from 1993 to 2011. *BMC Health Services Research*. 2018;18(1):102.
23. Peng X, Song S, Sullivan S, Qiu J, Wang W. Ageing, the Urban-Rural Gap and Disability Trends: 19 Years of Experience in China - 1987 to 2006. *PLOS ONE*. 2010;5(8):e12129.
24. Zhang X, Dupre ME, Qiu L, Zhou W, Zhao Y, Gu D. Urban-rural differences in the association between access to healthcare and health outcomes among older adults in China. *BMC Geriatr*. 2017;17(1):151.
25. 封进, 余央央, 楼易平. 医疗需求与中国医疗费用增长. *中国社会科学*. 2015;3:85-103.
26. 刘国恩, 蔡春光, 李林. 中国老人医疗保障与医疗服务需求的实证分析. *经济研究*. 2011;3:95-107.
27. 许建强, 郑娟, 李佳佳, 徐凌忠. 全民健康覆盖内涵下城乡居民卫生服务需要和利用现状及其公平性差异研究. *中国全科医学*. 2018;21(34):4163-8.

- 
28. 杨红燕, 黄梦. 灾难性卫生支出的城乡差异及分配敏感性研究. 中国卫生政策研究. 2018;11(7):24-9.
  29. 汪彦辉. 全民健康覆盖视角下江苏省医改进展评价研究: 南京医科大学; 2015.
  30. 翁凝, 宁满秀. 基本医疗保险补偿率对城乡居民医疗支出不平等的影响. 华南理工大学学报 (社会科学版). 2019;21(4):30-42.
  31. 静熊黄. 我国城乡医疗服务利用的不平等研究——一项于 CHARLS 数据的实证分析. 人口学刊. 2016:15.
  32. 李建新, 李春华. 城乡老年人口健康差异研究. 人口学刊. 2014;36(5):37-47.
  33. 李建新, 夏翠翠. 我国城乡老年人口医疗服务可及性差异研究——基于 2011 年中国老年健康影响因素跟踪调查数据. 中国卫生政策研究. 2014;7(9):39-44.
  34. Zeng Y, Feng Q, Hesketh T, Christensen K, Vaupel JW. Survival, disabilities in activities of daily living, and physical and cognitive functioning among the oldest-old in China: a cohort study. *The Lancet*. 2017;389(10079):1619-29.
  35. Zeng Y, Vaupel J, Xiao Z, Liu Y, Zhang C. Chinese Longitudinal Healthy Longevity Survey (CLHLS), 1998-2014. Inter-university Consortium for Political and Social Research [distributor]; 2017.
  36. Gu D. General data quality assessment of the CLHLS. *Healthy longevity in China*: Springer; 2008. p. 39-60.
  37. Zhang X, Dupre ME, Qiu L, Zhou W, Zhao Y, Gu D. Urban-rural differences in the association between access to healthcare and health outcomes among older adults in China. *BMC Geriatr*. 2017;17(1):151-.
  38. China NBoSo. Regulation for statistical definition of urban and rural areas (provisional). National Bureau of Statistics of China. 2008.
  39. Gordon L, Chunguang C, Lin L. Medical Insurance and Medical Care Demand for the Elderly in China [J]. *Economic Research Journal*. 2011;3.
  40. China NBoSo. National Data 2019 [Available from: <http://data.stats.gov.cn/english/easyquery.htm?cn=C01>].
  41. Gu D, Zhang Z, Zeng Y. Access to healthcare services makes a difference in healthy longevity among older Chinese adults. *Soc Sci Med*. 2009;68(2):210-9.
  42. Huang C, Elo IT. Mortality of the oldest old Chinese: the role of early-life nutritional status, socio-economic conditions, and sibling sex-composition. *Population studies*. 2009;63(1):7-20.
  43. Mitchell CO, Lipschitz DA. Arm length measurement as an alternative to height in nutritional assessment of the elderly. *JPEN Journal of parenteral and enteral nutrition*. 1982;6(3):226-9.
  44. Kwok T, Whitelaw MN. The use of armspan in nutritional assessment of the elderly. *J Am Geriatr Soc*. 1991;39(5):492-6.
  45. Brown JK, Feng JY, Knapp TR. Is self-reported height or arm span a more accurate alternative measure of height? *Clin Nurs Res*. 2002;11(4):417-32.
  46. Zeng Y, Li J, Yuan Z, Fang Y. The effect of China's new cooperative medical scheme on health expenditures among the rural elderly. *International Journal for Equity in Health*. 2019;18(1):27.
  47. Mihaylova B, Briggs A, O'Hagan A, Thompson SG. Review of statistical methods for analysing healthcare resources and costs. *Health economics*. 2011;20(8):897-916.
  48. Deb P, Norton EC. Modeling health care expenditures and use. *Annual review of public health*. 2018;39:489-505.
  49. Cawley J, Meyerhoefer C. The medical care costs of obesity: an instrumental variables approach. *Journal of health economics*. 2012;31(1):219-30.
  50. Finkelstein EA, Trogdon JG, Cohen JW, Dietz W. Annual medical spending attributable to obesity: payer-and service-specific estimates. *Health affairs*. 2009;28(5):w822-w31.
  51. Lê Cook B, McGuire TG, Lock K, Zaslavsky AM. Comparing methods of racial and ethnic disparities measurement across different settings of mental health care. *Health services research*. 2010;45(3):825-47.
  52. Yi Z, Vaupel JW. Functional Capacity and Self-Evaluation of Health and Life of Oldest Old in China. *Journal of Social Issues*. 2002;58(4):733-48.
  53. Wen M, Gu D. Air Pollution Shortens Life Expectancy and Health Expectancy for Older Adults: The Case of China. *The Journals of Gerontology: Series A*. 2012;67(11):1219-29.
  54. Hu X, Zeng Y, Zhen X, Zhang H, Li Y, Gu S, et al. Cognitive and physical function of people older than 80 years in China from 1998 to 2014. *Journal of International Medical Research*. 2018;46(7):2810-27.
  55. Wang D, Zheng J, Kurosawa M, Inaba Y, Kato N. Changes in activities of daily living (ADL) among elderly Chinese by marital status, living arrangement, and availability of healthcare over a 3-year period. *Environ Health Prev Med*. 2009;14(2):128-41.

- 
56. Gu D, Zeng Y. Changes of disability in activities of daily living among Chinese elderly from 1992 to 2002. *Population & Economics*. 2006;4:9-13.
  57. Gong P, Liang S, Carlton EJ, Jiang Q, Wu J, Wang L, et al. Urbanisation and health in China. *The Lancet*. 2012;379(9818):843-52.
  58. Sun R, Gu D. Air Pollution, Economic Development of Communities, and Health Status Among the Elderly in Urban China. *American Journal of Epidemiology*. 2008;168(11):1311-8.
  59. Biritwum R, Mensah G, Yawson A, Minicuci N. Study on global AGEing and adult health (SAGE), Wave 1: the Ghana national report. Geneva: World Health Organization. 2013.
  60. Team CR. Challenges of population aging in China: evidence from the national baseline survey of the China Health and Retirement Longitudinal Study (CHARLS). Beijing: School of National Development, Peking University. 2013.
  61. Zimmer Z, Kwong J. Socioeconomic status and health among older adults in rural and urban China. *Journal of aging and health*. 2004;16(1):44-70.
  62. Hou B, Nazroo J, Banks J, Marshall A. Are cities good for health? A study of the impacts of planned urbanization in China. *International journal of epidemiology*. 2019.
  63. Glinskaya E, Feng Z. Options for aged care in China: Building an efficient and sustainable aged care system: The World Bank; 2018.
  64. China NBoSo. Income of Urban and Rural Residents in 2011 2012 [Available from: [http://www.stats.gov.cn/english/newsevents/201201/t20120130\\_26566.html](http://www.stats.gov.cn/english/newsevents/201201/t20120130_26566.html)].
  65. Wanli Y. Rural-urban income gap narrows: CHINA DAILY; 2015 [Available from: [http://www.chinadaily.com.cn/china/2015-04/22/content\\_20509439.htm](http://www.chinadaily.com.cn/china/2015-04/22/content_20509439.htm)].
  66. Zhou Z, Zhou Z, Gao J, Lai S, Chen G. Urban-rural difference in the associations between living arrangements and the health-related quality of life (HRQOL) of the elderly in China-Evidence from Shaanxi province. *PLoS One*. 2018;13(9):e0204118-e.
  67. Organization WH. China country assessment report on ageing and health. 2015.
  68. Smits K, Goh C, Zhao L, Vashakmadze E, Hill J, Kuriakose S, et al. China Economic Update, June 2015. 2015.
  69. Fang H. The Chinese Health Care System 2016 [Available from: <https://international.commonwealthfund.org/countries/china/>].
  70. Meng Q, Xu L, Zhang Y, Qian J, Cai M, Xin Y, et al. Trends in access to health services and financial protection in China between 2003 and 2011: a cross-sectional study. *The Lancet*. 2012;379(9818):805-14.
  71. Haggerty JL, Roberge D, Lévesque J-F, Gauthier J, Loignon C. An exploration of rural–urban differences in healthcare-seeking trajectories: Implications for measures of accessibility. *Health & place*. 2014;28:92-8.
  72. Shi L. Health care in China: a rural-urban comparison after the socioeconomic reforms. *Bulletin of the World Health Organization*. 1993;71(6):723.
  73. Power C. Is China’s health care meeting the needs of its people? 2019 [Available from: <https://chinapower.csis.org/china-health-care-quality/>].
  74. Anand S, Fan VY, Zhang J, Zhang L, Ke Y, Dong Z, et al. China's human resources for health: quantity, quality, and distribution. *The Lancet*. 2008;372(9651):1774-81.
  75. Fang H, Meng Q, Rizzo JA. Do different health insurance plans in China create disparities in health care utilization and expenditures. *International Journal of Applied Economics*. 2014;11(1):1-18.
  76. Wang L, Wang A, Zhou D, FitzGerald G, Ye D, Jiang Q. An Empirical Analysis of Rural-Urban Differences in Out-Of-Pocket Health Expenditures in a Low-Income Society of China. *PLoS One*. 2016;11(5):e0154563.

**Table 1: Descriptive Statistics for study variables, by urban and rural residency**

| <b>Outcomes</b>                            | <b>Total (n=8921)</b> | <b>Urban (n=2624)</b> | <b>Rural (n=6297)</b> | <b>P value*</b> |
|--------------------------------------------|-----------------------|-----------------------|-----------------------|-----------------|
| ADL                                        | 8.92(2.36)            | 8.69(2.61)            | 9.01(2.24)            | <0.0001         |
| IADL                                       | 10.67(6.02)           | 10.78(6.23)           | 10.63(5.94)           | 0.2621          |
| Psychological well-being                   | 3.52(0.81)            | 3.65(0.70)            | 3.46(0.84)            | <0.0001         |
| Adequate access to care                    | 8483(95.7%)           | 2565(98.4%)           | 5918(94.5%)           | <0.0001         |
| Total medical expenditure                  | 4579 (12982.61)       | 8529 (18769.23)       | 2891 (8974.61)        | <0.0001         |
| Total inpatient expenditure                | 2881(9901.21)         | 5201(14031.81)        | 1859 (7147.76)        | <0.0001         |
| Total outpatient expenditure               | 1911(6271.77)         | 3627 (9355.54)        | 1182 (4132.92)        | <0.0001         |
| Total out of pocket expenditure            | 2038 (5757.34)        | 3332 (7913.48)        | 1486 (4423.76)        | <0.0001         |
| Total inpatient out of pocket expenditure  | 1466 (5530.98)        | 2184 (7252.01)        | 1051 (4176.41)        | <0.0001         |
| Total outpatient out of pocket expenditure | 1118 (3107.15)        | 1646 (3689.18)        | 896 (2797.70)         | <0.0001         |
| Self-payment ratio                         | 0.66(0.36)            | 0.53(0.38)            | 0.72(0.34)            | <0.0001         |
| <b>Covariates</b>                          |                       |                       |                       |                 |
| Age                                        |                       |                       |                       |                 |
| 65-69                                      | 433(4.8%)             | 116(4.4%)             | 317(5.0%)             |                 |
| 70-79                                      | 2681(30.1%)           | 924(35.2%)            | 1757(27.9%)           |                 |
| 80-89                                      | 2678(30.0%)           | 760(29.0%)            | 1918(30.5%)           |                 |
| 90-99                                      | 2132(23.9%)           | 612(23.3%)            | 1520(24.1%)           |                 |

|                             |                    |                    |                    |         |
|-----------------------------|--------------------|--------------------|--------------------|---------|
| >100                        | 997(11.2%)         | 212(8.1%)          | 785(12.5%)         | <0.0001 |
| Sex                         |                    |                    |                    |         |
| Female                      | 4615(51.7%)        | 1164(44.4%)        | 3451(54.8%)        | <0.0001 |
| Marital status              |                    |                    |                    |         |
| Married                     | 3594(40.6%)        | 1250(47.8%)        | 2344(37.5%)        | <0.0001 |
| Number of living children   | 3.76(1.72)         | 3.46(1.60)         | 3.88(1.75)         | <0.0001 |
| Annual income per capita    | 10984.27(13488.55) | 18618.78(15374.77) | 7787.901(11160.60) | <0.0001 |
| Education                   |                    |                    |                    |         |
| Never                       | 4738(53.1%)        | 815(31.1%)         | 3923(62.3%)        |         |
| Elementary school           | 2853(32.0%)        | 1015(38.7%)        | 1838(29.2%)        |         |
| Middle school               | 349(3.9%)          | 185(7.1%)          | 164(2.6%)          |         |
| High school or higher       | 584(6.6%)          | 436(16.5%)         | 148(2.4%)          |         |
| Missing                     | 397(4.4%)          | 173(6.6%)          | 224(3.5%)          | <0.0001 |
| Living with people          |                    |                    |                    |         |
| Yes                         | 7370(83.1%)        | 1321(88.7%)        | 5049(80.7%)        | <0.0001 |
| Drinking at present         |                    |                    |                    |         |
| Yes                         | 1456(16.5%)        | 392(15.1%)         | 1064(17.1%)        | 0.0199  |
| Smoking at present          |                    |                    |                    |         |
| Yes                         | 1567(17.6%)        | 428(16.4%)         | 1139(18.2%)        | 0.0433  |
| Regular exercise at present |                    |                    |                    |         |



|                                           |             |             |             |         |
|-------------------------------------------|-------------|-------------|-------------|---------|
| Yes                                       | 2979(33.9%) | 1462(56.5%) | 1517(24.4%) | <0.0001 |
| Sufficient financial support              |             |             |             |         |
| Yes                                       | 7249(81.7%) | 2342(89.5%) | 4907(78.4%) | <0.0001 |
| Went to bed hungry in childhood           |             |             |             |         |
| No                                        | 2118(23.7%) | 931(35.5%)  | 1187(18.8%) |         |
| Yes                                       | 5992(67.2%) | 1581(60.3%) | 4411(70.1%) |         |
| Missing                                   | 811(9.1%)   | 112(4.2%)   | 699(11.1%)  | <0.0001 |
| Able to access to healthcare in childhood |             |             |             |         |
| No                                        | 4456(50.0%) | 1191(45.4%) | 3265(51.9%) |         |
| Yes                                       | 2627(29.4%) | 1139(43.4%) | 1488(23.6%) |         |
| Missing                                   | 1838(20.6%) | 294(11.20)  | 1544(24.5%) | <0.0001 |
| Quality of sleeping                       |             |             |             |         |
| Very good                                 | 1661(18.7%) | 655(25.0%)  | 1006(16.0%) |         |
| Good                                      | 3843(43.2%) | 991(37.8%)  | 2852(45.4%) |         |
| So-so                                     | 2299(25.8%) | 633(24.2%)  | 1666(26.5%) |         |
| Bad                                       | 1101(12.3%) | 339(13.0%)  | 762(12.1%)  | <0.0001 |
| Arm length                                | 50.77(7.93) | 51.47(8.96) | 50.48(7.44) | <0.0001 |
| Number of diagnosed chronic diseases      | 2.49(4.83)  | 3.39(5.33)  | 2.11(4.56)  | <0.0001 |
| Severe disease                            |             |             |             |         |
| Yes                                       | 2240(25.8%) | 917(35.7%)  | 1323(21.4%) | <0.0001 |

|                                     |             |             |             |         |
|-------------------------------------|-------------|-------------|-------------|---------|
| <b>Occupation</b>                   |             |             |             |         |
| Profession/ Administration          | 882(9.9%)   | 694(26.5%)  | 188(3.0%)   |         |
| Others                              | 7521(84.3%) | 1909(72.7%) | 5612(89.1%) |         |
| Missing                             | 518(5.8%)   | 21(0.8%)    | 497(7.9%)   | <0.0001 |
| <b>Regular physical examination</b> |             |             |             |         |
| Yes                                 | 4163(47.0%) | 1123(42.9%) | 3040(48.7%) | <0.0001 |
| MMSE                                | 22.85(8.86) | 24.19(8.42) | 22.29(8.98) | <0.0001 |
| <b>Self-reported health</b>         |             |             |             |         |
| Very good                           | 823(9.3%)   | 338(12.9%)  | 485(7.7%)   |         |
| Good                                | 2984(33.5%) | 873(33.4%)  | 2111(33.6%) |         |
| So-so                               | 3193(35.9%) | 912(34.8%)  | 2281(36.3%) |         |
| Bad                                 | 1900(21.3%) | 496(18.9%)  | 1404(22.4%) | <0.0001 |
| <b>Region</b>                       |             |             |             |         |
| East                                | 4268(47.8%) | 1288(49.1%) | 2980(47.3%) |         |
| Middle                              | 2594(29.1%) | 628(23.9%)  | 1966(31.2%) |         |
| West                                | 2059(23.1%) | 708(27.0%)  | 1351(21.5%) | <0.0001 |

---

Percentage and numbers are mean (SD) or n (%). ADL=activities of daily living. IADL=instrumental activities of daily living. MMSE=Mini-mental State Examination. \* $\chi^2$  tests for categorical variables, and t tests for continuous variables between rural and urban.

---

**Table 2: Multivariable regression analyses based on pooled 2011 and 2014 data**

| <b>Outcomes</b>                            | <b>Urban-adjusted</b> | <b>Rural-adjusted</b> | <b>Adjusted difference</b> | <b>P value</b> |
|--------------------------------------------|-----------------------|-----------------------|----------------------------|----------------|
| ADL                                        | 8.52                  | 9.14                  | -0.62                      | <0.0001        |
| IADL                                       | 9.84                  | 11.08                 | -1.24                      | <0.0001        |
| Psychological well-being                   | 3.57                  | 3.51                  | 0.06                       | 0.0220         |
| Adequate access to care*                   | 0.99                  | 0.98                  | 2.24                       | 0.0018         |
| Total medical expenditure                  | 6335                  | 3605                  | 2730                       | <0.0001        |
| Total inpatient expenditure                | 3793                  | 2318                  | 1475                       | <0.0001        |
| Total outpatient expenditure               | 2708                  | 1370                  | 1338                       | <0.0001        |
| Total out of pocket expenditure            | 2575                  | 1718                  | 857                        | <0.0001        |
| Total inpatient out of pocket expenditure  | 1648                  | 1269                  | 379                        | 0.0051         |
| Total outpatient out of pocket expenditure | 1381.34               | 975.54                | 405.81                     | <0.0001        |
| Self-payment ratio                         | 55.8%                 | 69.5%                 | -13.7%                     | <0.0001        |

ADL=activities of daily living. IADL=instrumental activities of daily living. MMSE=Mini-mental State Examination. Urban-adjusted and rural-adjusted columns report margins of adjusted outcomes. Adjusted differences are marginal differences calculated based on the coefficients of the Urban variable. The adjusted difference of adequate access to care\* is odds ratio. Regressions on ADL, IADL, and psychological well-being, adjusted for age, sex, marital status, number of living children, annual income per capita, education, living with people, arm length, drinking at present, smoking at present, regular exercise at present, sufficient financial support, went to bed hungry in childhood, able to access to healthcare in childhood, quality of sleeping, occupation, regular physical examination, and regional and year dummies. Regression on adequate access to care, adjusted for age, sex, marital status, number of living children, annual income per capita, education, living with people, arm length, drinking at present, smoking at present, regular exercise at present, sufficient financial support, went to bed hungry in childhood, able to access to healthcare in childhood, quality of sleeping, occupation, regular physical examination, number of diagnosed chronic diseases, self-reported health status, severe diseases, ADL, IADL, MMSE, psychological well-being, and regional and year dummies. Regressions on total medical expenditure, total inpatient expenditure, total outpatient expenditure, total out of pocket expenditure, total inpatient out of pocket expenditure, total outpatient out of pocket expenditure and self-payment ratio, adjusted for age, sex, marital status, number of living children, annual income per capita, education, living with people, number of diagnosed chronic diseases, self-reported health status, occupation, severe diseases, ADL, IADL, MMSE, psychological well-being, and regional and year dummies. More detailed results are reported in the appendix.

**Table 3: Multivariable regressions by year**

| Outcomes                                   | 2011           |                |                     |         | 2014           |                |                     |         |
|--------------------------------------------|----------------|----------------|---------------------|---------|----------------|----------------|---------------------|---------|
|                                            | Urban-adjusted | Rural-adjusted | Adjusted difference | P value | Urban-adjusted | Rural-adjusted | Adjusted difference | P value |
| ADL                                        | 8.47           | 9.13           | -0.66               | <0.0001 | 8.59           | 9.18           | -0.59               | <0.0001 |
| IADL                                       | 9.73           | 11.11          | -1.38               | <0.0001 | 9.98           | 11.18          | -1.20               | <0.0001 |
| Psychological well-being                   | 3.57           | 3.47           | 0.10                | 0.0029  | 3.54           | 3.54           | -0.00               | 0.9360  |
| Adequate access to care*                   | 0.99           | 0.97           | 2.13                | 0.0080  | 0.99           | 0.98           | 1.93                | 0.0848  |
| Total medical expenditure                  | 5536           | 3192           | 2344                | <0.0001 | 7343           | 3934           | 3409                | <0.0001 |
| Total inpatient expenditure                | 3255           | 1967           | 1288                | <0.0001 | 4284           | 2681           | 1603                | <0.0001 |
| Total outpatient expenditure               | 2365           | 1336           | 1029                | <0.0001 | 3200           | 1376           | 1824                | <0.0001 |
| Total out of pocket expenditure            | 2247           | 1887           | 360                 | 0.0193  | 3050           | 1574           | 1476                | <0.0001 |
| Total inpatient out of pocket expenditure  | 1317           | 1156           | 161                 | 0.2770  | 2246           | 1444           | 802                 | 0.0008  |
| Total outpatient out of pocket expenditure | 1215           | 1092           | 123                 | 0.2062  | 1660           | 861            | 799                 | <0.0001 |
| Self-payment ratio                         | 56.6%          | 76.2%          | -19.6%              | <0.0001 | 55.5%          | 63.4%          | -7.9%               | <0.0001 |

ADL=activities of daily living. IADL=instrumental activities of daily living. MMSE=Mini-mental State Examination. Urban-adjusted and rural-adjusted columns report margins of adjusted outcomes. Adjusted differences are marginal differences calculated based on the coefficients of the Urban variable. The adjusted difference of adequate access to care\* are odds ratios. Regressions on ADL, IADL, and psychological well-being, adjusted for age, sex, marital status, number of living children, annual income per capita, education, living with people, arm length, drinking at present, smoking at present, regular exercise at present, sufficient financial support, went to bed hungry in childhood, able to access to healthcare in childhood, quality of sleeping, occupation, regular physical examination, and regional dummies. Regression on adequate access to care, adjusted for age, sex, marital status, number of living children, annual income per capita, education, living with people, arm length, drinking at present, smoking at present, regular exercise at present, sufficient financial support, went to bed hungry in childhood, able to access to healthcare in childhood, quality of sleeping, occupation, regular physical examination, number of diagnosed chronic diseases, self-reported health status, severe diseases, ADL, IADL, MMSE, psychological well-being, and regional dummies. Regressions on total medical expenditure, total inpatient expenditure, total outpatient expenditure, total out of pocket expenditure, total inpatient out of

pocket expenditure, total outpatient out of pocket expenditure and self-payment ratio, adjusted for age, sex, marital status, number of living children, annual income per capita, education, living with people, number of diagnosed chronic diseases, self-reported health status, occupation, severe diseases, ADL, IADL, MMSE, psychological well-being, and regional dummies. More detailed results are reported in the appendix.

---

**Table 4: Nonparametric test results**

| <b>Outcomes</b>                            | <b>Change in rural-urban difference (2011vs2014)</b> | <b>P value (Nonparametric tests)</b> |
|--------------------------------------------|------------------------------------------------------|--------------------------------------|
| ADL                                        | -0.07                                                | <0.0001                              |
| IADL                                       | -0.18                                                | <0.0001                              |
| Psychological well-being                   | 0.10                                                 | <0.0001                              |
| Adequate access to care*                   | 1.11                                                 | <0.0001                              |
| Total medical expenditure                  | -1065                                                | 0.1055                               |
| Total inpatient expenditure                | -315                                                 | 0.5506                               |
| Total outpatient expenditure               | -795                                                 | 0.0147                               |
| Total out of pocket expenditure            | -1116                                                | 0.0007                               |
| Total inpatient out of pocket expenditure  | -641                                                 | 0.0364                               |
| Total outpatient out of pocket expenditure | -676                                                 | 0.0002                               |
| Self-payment ratio                         | -11.7%                                               | <0.0001                              |

ADL=activities of daily living. IADL=instrumental activities of daily living. MMSE=Mini-mental State Examination. Change in rural-urban difference=Adjusted difference in 2011 –Adjusted difference in 2014. Change in rural-urban difference of adequate access to care\* is odds ratio (Change in rural-urban difference in coefficient of access to care=0.102). Regressions on ADL, IADL, and psychological well-being, adjusted for age, sex, marital status, number of living children, annual income per capita, education, living with people, arm length, drinking at present, smoking at present, regular exercise at present, sufficient financial support, went to bed hungry in childhood, able to access to healthcare in childhood, quality of sleeping, occupation, regular physical examination, and regional dummies. Regression on adequate access to care, adjusted for age, sex, marital status, number of living children, annual income per capita, education, living with people, arm length, drinking at present, smoking at present, regular exercise at present, sufficient financial support, went to bed hungry in childhood, able to access to healthcare in childhood, quality of sleeping, occupation, regular physical examination, number of diagnosed chronic diseases, self-reported health status, severe diseases, ADL, IADL, MMSE, psychological well-being, and regional dummies. Regressions on total medical expenditure, total inpatient expenditure, total outpatient expenditure, total out of pocket expenditure, total inpatient out of pocket expenditure, total outpatient out of pocket expenditure and self-payment ratio, adjusted for age, sex, marital status, number of living children, annual income per capita, education, living with people, number of diagnosed chronic diseases, self-reported health status, occupation, severe diseases, ADL, IADL, MMSE, psychological well-being, and regional dummies.



Click here to access/download  
**Supporting Information**  
appendix.docx



Supplement: pone.0240194.s003.pdf [file pone.0240194.s003.pdf]
